# Supplementary material for: Symmetric exponential amplification reaction-based DNA nanomachine for the fluorescent detection of nucleic acids
Source: Royal Society of Chemistry journal article supplement (doi:10.1039/c9ra08854g), 2019-01-01
Supplement: c9ra08854g1.pdf [file c9ra08854g1.pdf]

## Supporting Information

### **Symmetric exponential amplification reaction based DNA nanomachine for the fluorescent detection of nucleic acids**

Qi Yan<sup>a</sup>, Qiuyue Duan<sup>a</sup>, Yuqi Huang<sup>a</sup>, Jing Guo<sup>b</sup>, Liang Zhong<sup>a</sup>, Hong Wang<sup>a</sup>, Gang Yi<sup>a,\*</sup>

<sup>a</sup> *Key Laboratory of Clinical Laboratory Diagnostics (Ministry of Education), College of  
Laboratory Medicine, Chongqing Medical University, Chongqing 400016, China*

<sup>b</sup> *Department of Laboratory Medicine, Chongqing Traditional Chinese Medicine Hospital,  
Chongqing, Chongqing 400021, China*

---

\* Corresponding author. Tel: +86 23 68485240; Fax: +86 23 68485239

E-mail address: yigang666@cqmu.edu.cn (G. Yi).

**Table S1.** All the oligonucleotide sequences involved in this study.

| Sequence Name                       | oligonucleotide sequences (5'-3')                                  |
|-------------------------------------|--------------------------------------------------------------------|
| P-HP6                               | CCCGCCCTACCCACCTCAGCGTGCTGCAGAGACCGGCGCACAGA<br>GCCTCAGCACGCGT     |
| P-HP8                               | CCCGCCCTACCCACCTCAGCGGTAGCCAGAGACCGGCGCACAG<br>AGCCTCAGCTACGCGTA   |
| P-HP10                              | CCCGCCCTACCCACCTCAGCGTAAGCCAGAGACCGGCGCACAGA<br>GCCTCAGCTTACGCGTAA |
| Target DNA                          | TTCCTCTGTGCGCCGGTCTCTCCT                                           |
| MT1                                 | TTCCTCTGTGCGCCGGTCTATCCT                                           |
| MT2                                 | TTCCTCTGTGCGCCAGTCTATCCT                                           |
| MT3                                 | TTCCTCTGTACGCCAGTCTATCCT                                           |
| NC                                  | AGAGGTAGTAGGTTGCATAGTTGA                                           |
| SP                                  | CCCGCCCTACCCACCTCAGCAGGAGAGACCGGCGCCTCAGCAGG<br>AGAGACCGGCGCTT     |
| The produced G-<br>triplex fragment | TGAGGGGGCGGGATGGGT                                                 |

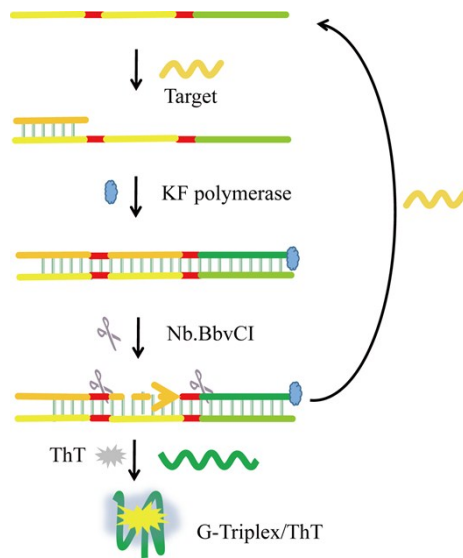

Fig. S1. Schematic of the classical exponential amplification reaction (EXPAR).

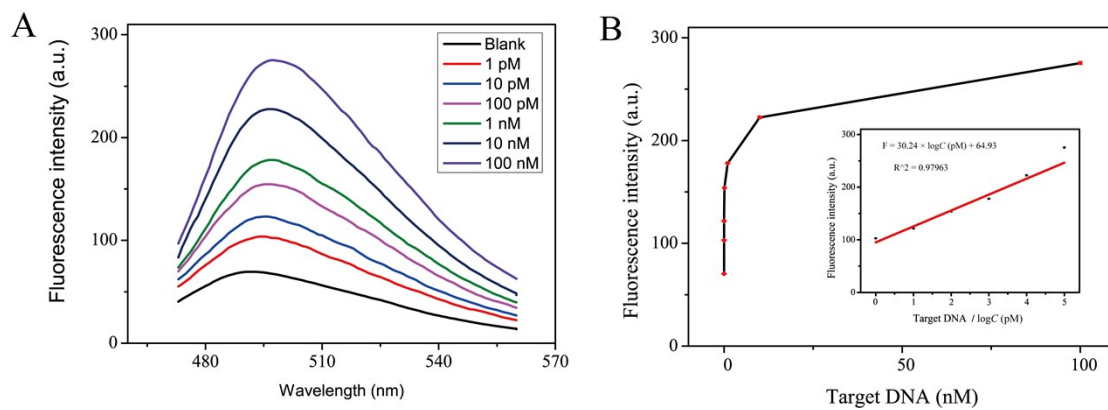

Fig. S2. Capability of classical EXPAR based DNA nanomachine to quantify target DNA. (A) Fluorescence spectra of various concentrations of target DNA (0 , 1 pM, 10 pM, 100 pM, 1 nM, 10nM and 100 nM). (B) The dose-response curves of fluorescence intensity and various concentrations of target DNA. (Inset) The linear correlation between fluorescence intensity and the logarithm of target DNA concentration.

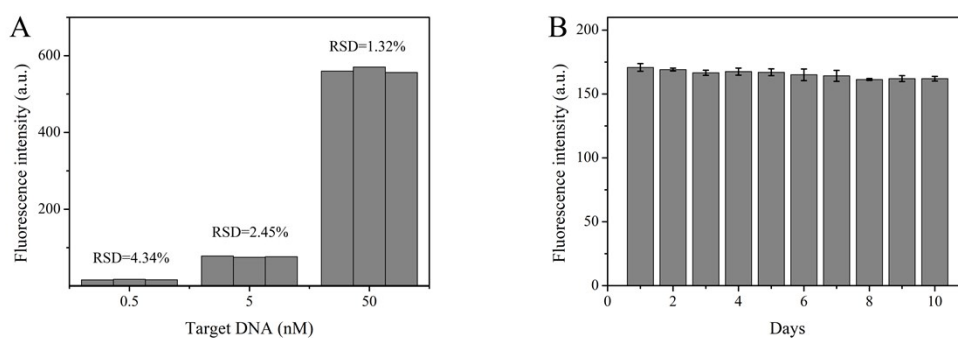

**Fig. S3.** (A) Reproducibility of the proposed sensor among three times detection in different concentration of target samples. (B) Stability of the proposed sensor during 10 days storage at 4°C. The error bars represent the standard deviations of three parallel experiments for each concentration of target DNA.

**Table S2.** Comparison of the proposed method for nucleic acids detection and those reported in literature.

| Methods                  | Detection modes | Sensitivity | Linear range        | References |
|--------------------------|-----------------|-------------|---------------------|------------|
| EXPAR                    | Fluorescence    | 91 pM       | 0.5 nM - 50 nM      | [1]        |
| P-MB based SDA           | Fluorescence    | 100 pM      | 0.1 nM - 75 nM      | [2]        |
| Dual-CNDP based<br>EXPAR | Fluorescence    | 50 pM       | 0.05 nM - 150<br>nM | [3]        |
| DFA-machine              | Colorimetric    | 10 pM       | 0.01nM - 150<br>nM  | [4]        |
| Reverse-SDA              | Fluorescence    | 1 nM        | 1 nM - 100 nM       | [5]        |
| DHMB-based SDA           | Colorimetric    | 4 pM        | 4 pM - 400 nM       | [6]        |
| MI-MB-based system       | Fluorescence    | 0.5 nM      | 0.5 nM - 400<br>nM  | [7]        |
| Toehold mediated SDA     | Fluorescence    | 0.08 nM     | 0.08 nM - 200<br>nM | [8]        |
| N-RCA and S-SDA          | Fluorescence    | 5 pM        | 5 pM - 20 nM        | [9]        |
| S-EXPAR                  | Fluorescence    | 10 pM       | 10 pM - 300<br>nM   | This work  |

References:

- [1] H. Zhao, J. Dong, F. Zhou, B. Li, *Microchimica Acta*, 2015, 182, 2495-2502.
- [2] F. Li, H. Zhao, Z.Y. Wang, Z.S. Wu, Z. Yang, C.C. Li, *Biosens. Bioelectron.*, 2017, 91, 692-698.
- [3] J. Xu, Z.S. Wu, W. Shen, H. Xu, H. Li, L. Jia, *Biosens. Bioelectron.*, 2015, 73, 19-25.
- [4] H. Xu, D. Wu, C.Q. Li, Z. Lu, X.Y. Liao, J. Huang, *Biosens. Bioelectron.*, 2017, 90, 314-320.
- [5] L. Wang, Y. Han, S. Xiao, S. Lv, C. Wang, N. Zhang, *Talanta*, 2018, 187, 365-369.
- [6] D. Wu, H. Xu, H. Shi, W. Li, M. Sun, Z.S. Wu, *Anal. Chim. Acta.*, 2017, 957, 55-62.
- [7] J. Xu, T. Zheng, J. Le, L. Jia, *Talanta*, 2018, 187, 272-278.
- [8] Z.Y. Wang, F. Li, Y. Zhang, H. Zhao, H. Xu, Z.-S. Wu, *Sens. Actuators B: Chem.*, 2017, 251, 692-698.
- [9] H. Xu, Y. Zhang, S. Zhang, M. Sun, W. Li, Y. Jiang, *Anal. Chim. Acta.*, 2019, 1047, 172-178.
